# Supplementary material for: Comparative genomics and transcriptomics analysis of the bHLH gene family indicate their roles in regulating flavonoid biosynthesis in Sophora flavescens
Source: Front Plant Sci. 2024 Sep 24;15:1445488. doi: 10.3389/fpls.2024.1445488 (PMC11458398; doi:10.3389/fpls.2024.1445488)
Supplement: Supplementary Table 1 — Detailed information of the S. flavescens, S. moorcroftiana, and S. japonica bHLH gene family. [file Table1.xlsx]

## Sheet: S. flavescens
NO.	Gene ID	Gene name	Start	End	Chromosome	Group	Gene length	pI	MW (kDa)	Protein length
1	Sfla_1G0451800	SfbHLH001	22804303	22806311	Chr1	16	2009	9.09	10.5659	93
2	Sfla_1G0054000	SfbHLH002	35871482	35872214	Chr1	24	733	9.65	14.5654	128
3	Sfla_1G0112300	SfbHLH003	80365658	80368506	Chr1	3	2849	6.47	33.9903	306
4	Sfla_1G0114600	SfbHLH004	81733673	81736479	Chr1	15	2807	4.96	51.1596	468
5	Sfla_1G0128300	SfbHLH005	89450576	89470047	Chr1	12	19472	8.78	56.4288	501
6	Sfla_1G0577100	SfbHLH006	104665937	104667771	Chr1	10	1835	7.79	21.3587	192
7	Sfla_1G0649300	SfbHLH007	154803366	154807635	Chr1	24	4270	6.44	59.0564	534
8	Sfla_1G0298800	SfbHLH008	210198612	210200387	Chr1	28	1776	7.7	37.1436	336
9	Sfla_1G0737100	SfbHLH009	224722019	224723816	Chr1	9	1798	5.61	53.5906	475
10	Sfla_1G0761400	SfbHLH010	248100407	248104455	Chr1	27	4049	9.16	43.6156	396
11	Sfla_1G0794800	SfbHLH011	271446465	271451995	Chr1	24	5531	5.95	75.3184	691
12	Sfla_1G0391600	SfbHLH012	280900043	280901838	Chr1	10	1796	5.64	38.2451	337
13	Sfla_2G0439400	SfbHLH013	10214936	10217173	Chr2	4	2238	8.33	31.505	282
14	Sfla_2G0454600	SfbHLH014	17372212	17375464	Chr2	25	3253	5.55	48.8795	444
15	Sfla_2G0464900	SfbHLH015	24153536	24157684	Chr2	27	4149	6.03	44.6213	406
16	Sfla_2G0075100	SfbHLH016	34511964	34513705	Chr2	1	1742	5.13	36.2048	324
17	Sfla_2G0075300	SfbHLH017	34580029	34581733	Chr2	1	1705	5.32	32.654	292
18	Sfla_2G0523500	SfbHLH018	51173970	51175729	Chr2	13	1760	8.27	28.672	258
19	Sfla_2G0524600	SfbHLH019	51413893	51415650	Chr2	13	1758	8.59	28.697	258
20	Sfla_2G0530600	SfbHLH020	54626090	54629140	Chr2	4	3051	7.69	25.5852	233
21	Sfla_2G0116000	SfbHLH021	55848976	55852282	Chr2	15	3307	6.74	54.4941	492
22	Sfla_2G0143000	SfbHLH022	70929305	70929904	Chr2	25	600	6.53	21.6395	199
23	Sfla_2G0143300	SfbHLH023	71096098	71098343	Chr2	30	2246	5.95	32.2504	279
24	Sfla_2G0592200	SfbHLH024	86068192	86071832	Chr2	27	3641	8.85	45.6307	416
25	Sfla_2G0592400	SfbHLH025	86143417	86147054	Chr2	27	3638	8.85	45.5707	416
26	Sfla_2G0617800	SfbHLH026	98893770	98895467	Chr2	12	1698	6.61	26.7692	233
27	Sfla_2G0193800	SfbHLH027	98945570	98946796	Chr2	12	1227	6.15	24.4937	215
28	Sfla_2G0275700	SfbHLH028	170242806	170244409	Chr2	7	1604	9.26	19.0559	163
29	Sfla_2G0277900	SfbHLH029	171946621	171947521	Chr2	7	901	4.98	20.6171	176
30	Sfla_2G0706700	SfbHLH030	172042655	172044257	Chr2	7	1603	5.04	30.0948	260
31	Sfla_2G0278900	SfbHLH031	172396229	172397801	Chr2	7	1573	5.04	29.9916	260
32	Sfla_2G0709400	SfbHLH032	173838348	173839193	Chr2	7	846	6.91	16.7338	143
33	Sfla_2G0319600	SfbHLH033	200919108	200927447	Chr2	24	8340	6.59	48.2888	451
34	Sfla_2G0343500	SfbHLH034	224052354	224055605	Chr2	25	3252	6.16	56.3773	520
35	Sfla_3G0044500	SfbHLH035	21435671	21439173	Chr3	3	3503	7.38	53.4391	481
36	Sfla_3G0044800	SfbHLH036	21530845	21534056	Chr3	3	3212	5.87	39.8267	359
37	Sfla_3G0053500	SfbHLH037	25787426	25790259	Chr3	24	2834	5.27	43.3191	393
38	Sfla_3G0053900	SfbHLH038	25983193	25983834	Chr3	31	642	9.45	23.978	213
39	Sfla_3G0440100	SfbHLH039	36200464	36203663	Chr3	4	3200	6.38	39.3726	352
40	Sfla_3G0102600	SfbHLH040	48002664	48004688	Chr3	10	2025	8.3	34.253	301
41	Sfla_3G0104300	SfbHLH041	49305834	49307891	Chr3	2	2058	5.6	74.198	685
42	Sfla_3G0466000	SfbHLH042	50030781	50032708	Chr3	1	1928	4.75	37.247	331
43	Sfla_3G0110000	SfbHLH043	52404304	52405457	Chr3	13	1154	9.83	18.7925	162
44	Sfla_3G0484400	SfbHLH044	60573337	60576811	Chr3	25	3475	6.99	28.2822	259
45	Sfla_3G0138800	SfbHLH045	68783639	68786855	Chr3	1	3217	8.82	52.9098	472
46	Sfla_3G0510000	SfbHLH046	76664274	76668460	Chr3	25	4187	9.18	30.3686	282
47	Sfla_3G0516900	SfbHLH047	79706842	79708525	Chr3	16	1684	6.72	10.2727	93
48	Sfla_3G0537800	SfbHLH048	92502221	92503897	Chr3	11	1677	8.42	33.9287	300
49	Sfla_3G0174500	SfbHLH049	92713884	92717730	Chr3	11	3847	8.43	32.4479	290
50	Sfla_3G0177100	SfbHLH050	94385450	94386881	Chr3	11	1432	5.35	18.2859	158
51	Sfla_3G0177200	SfbHLH051	94505374	94506817	Chr3	11	1444	9.06	33.1496	291
52	Sfla_3G0177500	SfbHLH052	94723918	94725445	Chr3	11	1528	5.63	34.9357	313
53	Sfla_3G0177600	SfbHLH053	94891185	94893681	Chr3	11	2497	8.57	34.4043	304
54	Sfla_3G0177800	SfbHLH054	94966353	94968851	Chr3	11	2499	8.62	33.8393	300
55	Sfla_3G0178000	SfbHLH055	95039197	95041774	Chr3	11	2578	9.01	31.1314	274
56	Sfla_3G0178400	SfbHLH056	95186210	95188147	Chr3	11	1938	8.39	33.306	295
57	Sfla_3G0178600	SfbHLH057	95360575	95364373	Chr3	11	3799	6.72	32.2687	290
58	Sfla_3G0185500	SfbHLH058	100254140	100260366	Chr3	15	6227	8.56	13.9048	125
59	Sfla_3G0581100	SfbHLH059	128903561	128904799	Chr3	1	1239	6.36	24.3352	212
60	Sfla_3G0232500	SfbHLH060	144309837	144311669	Chr3	9	1833	5.13	55.0501	493
61	Sfla_3G0642300	SfbHLH061	178546165	178550465	Chr3	24	4301	5.54	39.3988	357
62	Sfla_3G0663000	SfbHLH062	189484663	189488041	Chr3	3	3379	6.47	40.1792	358
63	Sfla_3G0309700	SfbHLH063	203149036	203153325	Chr3	5	4290	5.94	70.4807	627
64	Sfla_3G0722000	SfbHLH064	224995061	224996598	Chr3	25	1538	5.55	30.9687	274
65	Sfla_3G0748800	SfbHLH065	243180279	243181440	Chr3	24	1162	5.87	28.5341	257
66	Sfla_3G0749200	SfbHLH066	243588129	243589255	Chr3	24	1127	6.5	23.3151	211
67	Sfla_4G0403400	SfbHLH067	43018974	43023339	Chr4	14	4366	4.92	35.3511	320
68	Sfla_4G0129300	SfbHLH068	109157250	109158775	Chr4	25	1526	7.02	25.8543	227
69	Sfla_4G0489100	SfbHLH069	117198463	117205280	Chr4	13	6818	5.88	45.6266	410
70	Sfla_4G0491100	SfbHLH070	119033075	119037347	Chr4	14	4273	6.4	35.6634	325
71	Sfla_4G0493300	SfbHLH071	120503378	120507870	Chr4	25	4493	5.69	60.373	563
72	Sfla_4G0153300	SfbHLH072	124072172	124074923	Chr4	10	2752	5.19	49.1612	430
73	Sfla_4G0176000	SfbHLH073	135171062	135172933	Chr4	16	1872	9.03	10.4038	93
74	Sfla_4G0192400	SfbHLH074	148964397	148965212	Chr4	25	816	8.89	29.447	271
75	Sfla_4G0219100	SfbHLH075	164873963	164875486	Chr4	2	1524	5.99	56.8457	507
76	Sfla_4G0554600	SfbHLH076	164978683	164980206	Chr4	2	1524	5.89	56.7777	507
77	Sfla_4G0221400	SfbHLH077	166060918	166064261	Chr4	10	3344	5.45	46.6467	412
78	Sfla_4G0581300	SfbHLH078	180330191	180332419	Chr4	10	2229	5.94	37.3919	338
79	Sfla_4G0583200	SfbHLH079	181374656	181376103	Chr4	13	1448	6.56	29.1056	265
80	Sfla_4G0252300	SfbHLH080	182652138	182654221	Chr4	1	2084	4.81	39.7869	347
81	Sfla_4G0279400	SfbHLH081	198104249	198106148	Chr4	28	1900	8.58	25.3327	229
82	Sfla_4G0286400	SfbHLH082	203217878	203219127	Chr4	13	1250	9.4	30.7343	275
83	Sfla_4G0638500	SfbHLH083	212414788	212418290	Chr4	24	3503	6.48	58.5416	531
84	Sfla_5G0019400	SfbHLH084	20716073	20720056	Chr5	15	3984	5.99	35.3073	324
85	Sfla_5G0310900	SfbHLH085	26098490	26100118	Chr5	25	1629	6.16	30.896	272
86	Sfla_5G0337800	SfbHLH086	42424782	42429994	Chr5	1	5213	5.02	55.6111	497
87	Sfla_5G0359600	SfbHLH087	56459155	56463818	Chr5	25	4664	5.73	46.3874	431
88	Sfla_5G0142500	SfbHLH088	114920669	114926461	Chr5	1	5793	6.6	62.675	569
89	Sfla_5G0172200	SfbHLH089	134561055	134563109	Chr5	13	2055	7.69	27.8335	250
90	Sfla_5G0457700	SfbHLH090	136459671	136463831	Chr5	15	4161	6.06	45.0127	406
91	Sfla_5G0181400	SfbHLH091	140049948	140051586	Chr5	4	1639	9.36	21.5559	196
92	Sfla_5G0187200	SfbHLH092	144829058	144831396	Chr5	13	2339	8.32	27.919	250
93	Sfla_5G0474000	SfbHLH093	149342863	149343678	Chr5	12	816	10.53	12.1901	102
94	Sfla_5G0199800	SfbHLH094	152593831	152594445	Chr5	25	615	7.87	22.1893	204
95	Sfla_5G0200500	SfbHLH095	152907643	152908458	Chr5	30	816	9.57	30.6911	271
96	Sfla_5G0212000	SfbHLH096	159817139	159821650	Chr5	23	4512	5.94	88.2129	813
97	Sfla_5G0506500	SfbHLH097	166926135	166927849	Chr5	1	1715	5.23	35.0005	313
98	Sfla_5G0243100	SfbHLH098	175426244	175430476	Chr5	27	4233	5.37	55.0144	499
99	Sfla_5G0259600	SfbHLH099	183122954	183126369	Chr5	15	3416	6.45	34.7748	314
100	Sfla_5G0549900	SfbHLH100	189197006	189199149	Chr5	3	2144	5.55	35.0428	317
101	Sfla_5G0550100	SfbHLH101	189324285	189328159	Chr5	3	3875	8.4	37.9618	345
102	Sfla_6G0025700	SfbHLH102	14065631	14066526	Chr6	16	896	5.82	17.9262	158
103	Sfla_6G0372700	SfbHLH103	15512341	15519633	Chr6	15	7293	7.77	46.9902	429
104	Sfla_6G0045800	SfbHLH104	24179275	24181952	Chr6	25	2678	7.1	41.0822	373
105	Sfla_6G0428300	SfbHLH105	42285302	42287187	Chr6	1	1886	4.61	37.9508	333
106	Sfla_6G0436900	SfbHLH106	46684540	46686975	Chr6	10	2436	5.71	37.2999	339
107	Sfla_6G0111900	SfbHLH107	59683203	59686125	Chr6	10	2923	5.94	38.4308	345
108	Sfla_6G0473800	SfbHLH108	69045436	69058212	Chr6	10	12777	9.1	58.9539	531
109	Sfla_6G0500500	SfbHLH109	87360571	87363862	Chr6	1	3292	5.95	61.2665	558
110	Sfla_6G0156800	SfbHLH110	87740321	87743432	Chr6	25	3112	9.27	45.7575	405
111	Sfla_6G0507800	SfbHLH111	95039997	95042135	Chr6	16	2139	6.92	20.5704	181
112	Sfla_6G0194300	SfbHLH112	120869929	120874401	Chr6	23	4473	4.57	83.9011	760
113	Sfla_6G0554100	SfbHLH113	124706356	124713436	Chr6	26	7081	6.65	39.0509	364
114	Sfla_6G0558600	SfbHLH114	127752178	127754043	Chr6	10	1866	5.73	31.8528	280
115	Sfla_6G0219000	SfbHLH115	131950446	131955823	Chr6	24	5378	6.07	83.9959	778
116	Sfla_6G0571100	SfbHLH116	132736967	132739387	Chr6	24	2421	9.01	59.5505	544
117	Sfla_6G0236500	SfbHLH117	140606083	140614267	Chr6	5	8185	5.07	58.6967	526
118	Sfla_6G0243000	SfbHLH118	143422335	143427061	Chr6	26	4727	6.1	31.1152	290
119	Sfla_6G0245900	SfbHLH119	145899544	145901091	Chr6	2	1548	5.37	56.2184	515
120	Sfla_6G0278800	SfbHLH120	161433663	161435328	Chr6	12	1666	8.97	26.8987	237
121	Sfla_6G0655100	SfbHLH121	176642529	176644437	Chr6	15	1909	5.86	28.3024	261
122	Sfla_6G0313800	SfbHLH122	177345191	177346759	Chr6	28	1569	5.21	39.3245	358
123	Sfla_6G0313900	SfbHLH123	177356403	177357986	Chr6	28	1584	4.85	40.6002	372
124	Sfla_6G0325400	SfbHLH124	183357417	183360991	Chr6	1	3575	5.68	70.5574	620
125	Sfla_6G0678800	SfbHLH125	188830848	188834654	Chr6	27	3807	8.16	31.9986	298
126	Sfla_7G0304700	SfbHLH126	5822674	5824328	Chr7	10	1655	5.99	20.9433	190
127	Sfla_7G0016300	SfbHLH127	7188633	7189633	Chr7	11	1001	9.54	20.2395	183
128	Sfla_7G0328800	SfbHLH128	17187413	17193099	Chr7	7	5687	6.58	63.4295	563
129	Sfla_7G0042200	SfbHLH129	18542982	18549146	Chr7	1	6165	5.12	27.1519	239
130	Sfla_7G0345300	SfbHLH130	25045397	25049231	Chr7	26	3835	6.36	43.7316	414
131	Sfla_7G0345400	SfbHLH131	25223422	25227276	Chr7	26	3855	5.56	41.0665	391
132	Sfla_7G0074400	SfbHLH132	33465347	33476548	Chr7	14	11202	8.75	66.9087	604
133	Sfla_7G0082400	SfbHLH133	38209564	38212115	Chr7	4	2552	5.85	25.0955	226
134	Sfla_7G0082800	SfbHLH134	38349279	38350117	Chr7	16	839	6.72	10.3337	92
135	Sfla_7G0085000	SfbHLH135	39330215	39333205	Chr7	25	2991	7.18	30.4536	270
136	Sfla_7G0388600	SfbHLH136	47348177	47350938	Chr7	25	2762	6.68	36.0952	323
137	Sfla_7G0398700	SfbHLH137	51144217	51146393	Chr7	31	2177	5.68	26.4642	240
138	Sfla_7G0169700	SfbHLH138	80690548	80692295	Chr7	9	1748	5.66	57.238	511
139	Sfla_7G0457000	SfbHLH139	85499792	85500508	Chr7	17	717	5.53	27.0164	238
140	Sfla_7G0244200	SfbHLH140	133424474	133428161	Chr7	25	3688	5.78	59.9966	551
141	Sfla_8G0248400	SfbHLH141	25517971	25523262	Chr8	1	5292	5.07	55.1847	494
142	Sfla_8G0255300	SfbHLH142	30044048	30047023	Chr8	23	2976	7.24	54.4522	490
143	Sfla_8G0281900	SfbHLH143	48678492	48685693	Chr8	24	7202	5.73	61.0825	553
144	Sfla_8G0073700	SfbHLH144	53887713	53895243	Chr8	23	7531	5.82	85.8943	774
145	Sfla_8G0295500	SfbHLH145	56299346	56303762	Chr8	15	4417	5.84	54.1037	490
146	Sfla_8G0077300	SfbHLH146	57303337	57307003	Chr8	13	3667	6.14	35.1825	314
147	Sfla_8G0102300	SfbHLH147	72317279	72321816	Chr8	25	4538	5.13	30.2504	287
148	Sfla_8G0359400	SfbHLH148	104546061	104552642	Chr8	26	6582	5.94	48.7368	462
149	Sfla_8G0391700	SfbHLH149	128277046	128283130	Chr8	7	6085	8.59	58.581	518
150	Sfla_8G0185100	SfbHLH150	132500439	132509990	Chr8	1	9552	6.19	30.6903	269
151	Sfla_8G0188800	SfbHLH151	134310925	134312220	Chr8	13	1296	8.78	27.5624	247
152	Sfla_9G0010900	SfbHLH152	6846167	6849013	Chr9	3	2847	6.11	34.4318	307
153	Sfla_9G0213900	SfbHLH153	7032127	7036968	Chr9	3	4842	5.12	40.5602	368
154	Sfla_9G0214100	SfbHLH154	7214411	7219482	Chr9	3	5072	4.48	16.9785	148
155	Sfla_9G0220500	SfbHLH155	10886260	10887000	Chr9	16	741	6.96	18.2621	160
156	Sfla_9G0226400	SfbHLH156	14381684	14385889	Chr9	15	4206	8.49	33.6287	307
157	Sfla_9G0085900	SfbHLH157	68376787	68381089	Chr9	27	4303	6.16	50.9515	464
158	Sfla_9G0103300	SfbHLH158	82725799	82728153	Chr9	30	2355	4.71	37.3774	324
159	Sfla_9G0145800	SfbHLH159	109680671	109682608	Chr9	12	1938	7.81	27.4455	243
160	Sfla_9G0146200	SfbHLH160	109864466	109866404	Chr9	12	1939	6.98	27.4454	243
161	Sfla_9G0352100	SfbHLH161	110221722	110223656	Chr9	12	1935	6.46	27.4984	244
162	Sfla_9G0364200	SfbHLH162	115144098	115149798	Chr9	25	5701	5.64	42.4147	389
163	Sfla_9G0388800	SfbHLH163	132262712	132269817	Chr9	24	7106	6.08	60.5479	551
164	Sfla_9G0400200	SfbHLH164	136728781	136733467	Chr9	26	4687	6.23	30.811	284
165	Sfla_9G0199400	SfbHLH165	141586566	141589144	Chr9	orphan	2579	5.43	36.8212	335
166	Sfla_0014U0002500	SfbHLH166	1388508	1398073	scaffold_0014	24	9566	6.14	57.679	517
167	Sfla_2952U0000200	SfbHLH167	4314	6657	scaffold_2952	30	2344	4.71	36.9499	321

## Sheet: S. moorcroftiana
NO.	Gene ID	Gene name	Start	End	Chromosome	Group	Gene length	pI	MW (kDa)	Protein length
1	evm.TU.cluster01.671	SmbHLH001	6133662	6135189	cluster01	3	1528	6.5	38.7756	347
2	evm.TU.cluster01.675	SmbHLH002	6165463	6167668	cluster01	3	2206	7.59	34.1722	303
3	evm.TU.cluster01.843	SmbHLH003	7718353	7720913	cluster01	24	2561	5.77	40.2198	365
4	evm.TU.cluster01.855	SmbHLH004	7820290	7824758	cluster01	31	4469	9.46	27.0383	243
5	evm.TU.cluster01.1184	SmbHLH005	10690725	10693241	cluster01	4	2517	6.5	36.5315	328
6	evm.TU.cluster01.1641	SmbHLH006	14599166	14600808	cluster01	10	1643	7.2	34.0096	301
7	evm.TU.cluster01.1691	SmbHLH007	14955007	14957049	cluster01	2	2043	5.38	74.3152	680
8	evm.TU.cluster01.1722	SmbHLH008	15258407	15259813	cluster01	1	1407	4.78	36.6634	325
9	evm.TU.cluster01.2150	SmbHLH009	19178124	19180960	cluster01	25	2837	6.55	30.7191	281
10	evm.TU.cluster01.2529	SmbHLH010	22022435	22025224	cluster01	1	2790	8.41	51.7014	458
11	evm.TU.cluster01.2728	SmbHLH011	23797991	23806797	cluster01	25	8807	6.99	35.3201	325
12	evm.TU.cluster01.2834	SmbHLH012	24831933	24838723	cluster01	16	6791	7.68	21.5347	193
13	evm.TU.cluster01.3640	SmbHLH013	31084963	31086606	cluster01	11	1644	8.52	23.4528	207
14	evm.TU.cluster01.3657	SmbHLH014	31185396	31187764	cluster01	11	2369	8.71	32.626	289
15	evm.TU.cluster01.3662	SmbHLH015	31217416	31221227	cluster01	11	3812	5.95	29.1631	260
16	evm.TU.cluster01.3939	SmbHLH016	33524881	33530578	cluster01	15	5698	8.33	18.361	166
17	evm.TU.cluster01.4003	SmbHLH017	34052004	34054927	cluster01	13	2924	8.35	29.2452	264
18	evm.TU.cluster01.4731	SmbHLH018	40193735	40196433	cluster01	11	2699	7.09	34.473	303
19	evm.TU.cluster01.5245	SmbHLH019	44467581	44468585	cluster01	1	1005	5.71	24.1749	211
20	evm.TU.cluster01.5907	SmbHLH020	49958800	49959543	cluster01	2	744	8.84	27.1922	247
21	evm.TU.cluster01.6284	SmbHLH021	53184808	53187534	cluster01	9	2727	6.11	59.7291	533
22	evm.TU.cluster01.673	SmbHLH022	57384958	57389311	cluster01	3	4354	5.94	39.9416	358
23	evm.TU.cluster01.8100	SmbHLH023	68647112	68649094	cluster01	31	1983	7.85	32.9617	298
24	evm.TU.cluster01.8161	SmbHLH024	69132090	69135718	cluster01	24	3629	5.59	35.0901	317
25	evm.TU.cluster01.8528	SmbHLH025	72156573	72158787	cluster01	3	2215	6.52	40.0921	357
26	evm.TU.cluster01.8534	SmbHLH026	72209581	72211413	cluster01	3	1833	5.28	40.7717	371
27	evm.TU.cluster01.9129	SmbHLH027	77510565	77514526	cluster01	5	3962	5.47	71.0153	632
28	evm.TU.cluster01.9657	SmbHLH028	82091395	82092954	cluster01	25	1560	5.35	30.0337	265
29	evm.TU.cluster02.419	SmbHLH029	3340270	3342586	cluster02	15	2317	5.18	50.9613	467
30	evm.TU.cluster02.572	SmbHLH030	4734113	4735067	cluster02	12	955	7.77	20.7776	185
31	evm.TU.cluster02.706	SmbHLH031	5865717	5868140	cluster02	13	2424	6.25	29.063	266
32	evm.TU.cluster02.1030	SmbHLH032	8998759	9000870	cluster02	10	2112	7.02	21.2646	192
33	evm.TU.cluster02.1951	SmbHLH033	17181308	17183395	cluster02	9	2088	5.76	54.4736	484
34	evm.TU.cluster02.2493	SmbHLH034	22551084	22552635	cluster02	28	1552	8.5	34.2963	309
35	evm.TU.cluster02.5512	SmbHLH035	48397279	48399367	cluster02	24	2089	6.39	45.2605	408
36	evm.TU.cluster02.8076	SmbHLH036	68825059	68828348	cluster02	27	3290	9.03	42.2619	384
37	evm.TU.cluster02.9147	SmbHLH037	77743274	77747267	cluster02	24	3994	5.58	73.9827	681
38	evm.TU.cluster02.9449	SmbHLH038	80182228	80183590	cluster02	10	1363	5.09	38.5932	340
39	evm.TU.cluster02.10044	SmbHLH039	85339479	85340915	cluster02	2	1437	5.62	54.0487	478
40	evm.TU.cluster03.61	SmbHLH040	515025	519182	cluster03	27	4158	8.41	33.6373	317
41	evm.TU.cluster03.308	SmbHLH041	2771632	2774844	cluster03	1	3213	5.31	64.9101	574
42	evm.TU.cluster03.594	SmbHLH042	5464729	5466649	cluster03	15	1921	6.05	28.4115	265
43	evm.TU.cluster03.631	SmbHLH043	5791534	5793059	cluster03	28	1526	4.9	39.1565	359
44	evm.TU.cluster03.922	SmbHLH044	8401237	8402439	cluster03	12	1203	9.36	27.1791	240
45	evm.TU.cluster03.1571	SmbHLH045	14339862	14343744	cluster03	26	3883	5.57	31.5766	296
46	evm.TU.cluster03.1639	SmbHLH046	15054452	15064530	cluster03	5	10079	4.9	72.2391	647
47	evm.TU.cluster03.1640	SmbHLH047	15077741	15086400	cluster03	5	8660	4.98	73.5326	657
48	evm.TU.cluster03.1978	SmbHLH048	18008686	18011528	cluster03	24	2843	8.37	57.812	531
49	evm.TU.cluster03.2025	SmbHLH049	18339546	18343363	cluster03	24	3818	5.64	80.3955	747
50	evm.TU.cluster03.2224	SmbHLH050	20022738	20024199	cluster03	10	1462	6.08	36.2708	320
51	evm.TU.cluster03.2350	SmbHLH051	21161766	21167651	cluster03	26	5886	6.27	39.5333	371
52	evm.TU.cluster03.2519	SmbHLH052	22734236	22738376	cluster03	23	4141	4.54	88.8465	803
53	evm.TU.cluster03.2964	SmbHLH053	26334860	26337920	cluster03	4	3061	6.35	23.9844	212
54	evm.TU.cluster03.3643	SmbHLH054	32053330	32056048	cluster03	13	2719	5.87	37.1257	329
55	evm.TU.cluster03.3689	SmbHLH055	32534117	32539066	cluster03	15	4950	6.33	55.6354	503
56	evm.TU.cluster03.3791	SmbHLH056	33563923	33575017	cluster03	23	11095	5.69	89.4441	812
57	evm.TU.cluster03.4019	SmbHLH057	35392054	35409057	cluster03	24	17004	6.27	66.4452	597
58	evm.TU.cluster03.630	SmbHLH058	54189136	54196230	cluster03	28	7095	4.89	38.8018	352
59	evm.TU.cluster03.7899	SmbHLH059	67454731	67458945	cluster03	1	4215	4.67	56.5198	507
60	evm.TU.cluster04.637	SmbHLH060	5414432	5423800	cluster04	15	9369	8.69	70.9232	624
61	evm.TU.cluster04.1095	SmbHLH061	9547162	9551171	cluster04	14	4010	5.62	37.9019	340
62	evm.TU.cluster04.4879	SmbHLH062	40415352	40416685	cluster04	25	1334	6.66	26.9324	235
63	evm.TU.cluster04.5444	SmbHLH063	44790657	44795065	cluster04	13	4409	6.13	44.5282	398
64	evm.TU.cluster04.5741	SmbHLH064	47236394	47238396	cluster04	10	2003	5.1	47.5907	419
65	evm.TU.cluster04.5964	SmbHLH065	48987008	48989824	cluster04	25	2817	5.46	60.7374	567
66	evm.TU.cluster04.6103	SmbHLH066	50138604	50144426	cluster04	14	5823	6.32	37.2751	338
67	evm.TU.cluster04.6845	SmbHLH067	56243929	56245096	cluster04	16	1168	4.55	37.6911	341
68	evm.TU.cluster04.7715	SmbHLH068	63599394	63603344	cluster04	2	3951	8.78	81.8262	733
69	evm.TU.cluster04.7809	SmbHLH069	64509858	64511294	cluster04	2	1437	6.1	53.6051	478
70	evm.TU.cluster04.7878	SmbHLH070	65035473	65037802	cluster04	10	2330	5.36	46.9381	415
71	evm.TU.cluster04.8332	SmbHLH071	69190795	69192040	cluster04	10	1246	6.01	38.222	344
72	evm.TU.cluster04.8407	SmbHLH072	69788932	69789868	cluster04	13	937	9.02	28.7476	263
73	evm.TU.cluster04.8457	SmbHLH073	70193593	70195550	cluster04	1	1958	5.07	37.6308	330
74	evm.TU.cluster04.8907	SmbHLH074	74200643	74207800	cluster04	28	7158	8.41	60.8872	563
75	evm.TU.cluster04.9108	SmbHLH075	76016698	76017913	cluster04	13	1216	9.04	29.1184	261
76	evm.TU.cluster04.9460	SmbHLH076	79128944	79131909	cluster04	24	2966	7.98	59.9341	543
77	evm.TU.cluster05.275	SmbHLH077	2500027	2501481	cluster05	1	1455	5.73	35.9807	320
78	evm.TU.cluster05.629	SmbHLH078	5589892	5592570	cluster05	4	2679	6.66	26.7776	236
79	evm.TU.cluster05.637	SmbHLH079	5658238	5659140	cluster05	30	903	9.13	33.9246	300
80	evm.TU.cluster05.809	SmbHLH080	7228293	7230498	cluster05	12	2206	9.46	20.8639	180
81	evm.TU.cluster05.957	SmbHLH081	8519753	8521678	cluster05	13	1926	8.66	27.6156	248
82	evm.TU.cluster05.1147	SmbHLH082	10072329	10074799	cluster05	4	2471	6	25.8275	234
83	evm.TU.cluster05.1293	SmbHLH083	11329561	11333311	cluster05	15	3751	5.95	51.4677	466
84	evm.TU.cluster05.1378	SmbHLH084	12185156	12186837	cluster05	13	1682	7.71	27.8866	251
85	evm.TU.cluster05.2591	SmbHLH085	22493863	22506293	cluster05	1	12431	5.89	56.0621	513
86	evm.TU.cluster05.6988	SmbHLH086	57965429	57968147	cluster05	25	2719	6.02	46.3545	431
87	evm.TU.cluster05.7116	SmbHLH087	59090686	59092803	cluster05	28	2118	5.12	40.9151	365
88	evm.TU.cluster05.7233	SmbHLH088	60087334	60089893	cluster05	24	2560	6.83	33.1262	303
89	evm.TU.cluster05.8095	SmbHLH089	67582875	67600043	cluster05	25	17169	6.7	110.793	983
90	evm.TU.cluster05.8235	SmbHLH090	68806328	68810283	cluster05	15	3956	6.46	37.1626	339
91	evm.TU.cluster06.166	SmbHLH091	1344217	1347430	cluster06	25	3214	5.86	43.9854	400
92	evm.TU.cluster06.400	SmbHLH092	3307406	3312529	cluster06	15	5124	6.85	46.5214	426
93	evm.TU.cluster06.528	SmbHLH093	4322044	4323738	cluster06	31	1695	9.3	29.9592	275
94	evm.TU.cluster06.1211	SmbHLH094	10581229	10582618	cluster06	1	1390	4.69	37.8348	332
95	evm.TU.cluster06.1382	SmbHLH095	12113203	12115401	cluster06	10	2199	5.59	37.8293	341
96	evm.TU.cluster06.1956	SmbHLH096	17177585	17180555	cluster06	10	2971	5.14	37.8548	342
97	evm.TU.cluster06.3436	SmbHLH097	30042872	30046820	cluster06	1	3949	5.73	60.4132	553
98	evm.TU.cluster06.3508	SmbHLH098	30631029	30633603	cluster06	25	2575	9.13	39.0348	349
99	evm.TU.cluster06.3967	SmbHLH099	34365459	34371252	cluster06	30	5794	4.98	40.0465	353
100	evm.TU.cluster06.5628	SmbHLH100	47809422	47810700	cluster06	16	1279	9.09	10.5439	92
101	evm.TU.cluster06.5976	SmbHLH101	50481774	50493002	cluster06	25	11229	6.33	56.4121	526
102	evm.TU.cluster06.6111	SmbHLH102	51425351	51427000	cluster06	25	1650	5.59	47.3917	430
103	evm.TU.cluster06.6167	SmbHLH103	51946527	51950035	cluster06	12	3509	9.51	26.9198	239
104	evm.TU.cluster06.7265	SmbHLH104	61615249	61621066	cluster06	26	5818	5.99	47.7978	455
105	evm.TU.cluster06.8011	SmbHLH105	67950850	67958363	cluster06	7	7514	6.84	62.082	550
106	evm.TU.cluster06.8239	SmbHLH106	69916524	69927088	cluster06	1	10565	5.43	28.0923	248
107	evm.TU.cluster06.8311	SmbHLH107	70545830	70547000	cluster06	13	1171	8.7	28.7817	257
108	evm.TU.cluster07.249	SmbHLH108	1960552	1961811	cluster07	31	1260	6.36	46.7821	419
109	evm.TU.cluster07.512	SmbHLH109	4229582	4241672	cluster07	15	12091	8.93	43.292	392
110	evm.TU.cluster07.962	SmbHLH110	7793589	7797863	cluster07	3	4275	4.93	23.7878	210
111	evm.TU.cluster07.975	SmbHLH111	7900011	7903287	cluster07	3	3277	5.08	40.9986	374
112	evm.TU.cluster07.979	SmbHLH112	7981073	7983583	cluster07	3	2511	6.27	39.7811	356
113	evm.TU.cluster07.4646	SmbHLH113	37137630	37140098	cluster07	27	2469	6.23	45.3062	411
114	evm.TU.cluster07.5298	SmbHLH114	42725995	42728609	cluster07	30	2615	4.79	35.2698	307
115	evm.TU.cluster07.6355	SmbHLH115	51334375	51336359	cluster07	12	1985	9.59	24.8312	223
116	evm.TU.cluster07.6359	SmbHLH116	51383090	51384521	cluster07	12	1432	7.83	27.6725	246
117	evm.TU.cluster07.6533	SmbHLH117	53139572	53144438	cluster07	25	4867	5.67	39.5836	361
118	evm.TU.cluster07.7033	SmbHLH118	57547140	57552234	cluster07	24	5095	6.34	59.4629	539
119	evm.TU.cluster07.7138	SmbHLH119	58580667	58585697	cluster07	23	5031	6.13	78.6566	707
120	evm.TU.cluster07.7152	SmbHLH120	58750250	58751773	cluster07	2	1524	5.41	55.7909	507
121	evm.TU.cluster07.7177	SmbHLH121	58921935	58925597	cluster07	26	3663	5.87	30.7189	284
122	evm.TU.cluster07.7264	SmbHLH122	59689972	59692748	cluster07	orphan	2777	5.1	37.2317	334
123	evm.TU.cluster07.7395	SmbHLH123	60813407	60815617	cluster07	3	2211	7.67	37.6606	339
124	evm.TU.cluster07.7402	SmbHLH124	60857270	60860198	cluster07	3	2929	5.96	37.3526	334
125	evm.TU.cluster07.7575	SmbHLH125	62266723	62269721	cluster07	15	2999	6.37	35.1301	317
126	evm.TU.cluster07.7645	SmbHLH126	62794203	62795561	cluster07	31	1359	6.03	49.9728	452
127	evm.TU.cluster07.7823	SmbHLH127	64358695	64361169	cluster07	27	2475	5.36	47.0185	422
128	evm.TU.cluster07.8231	SmbHLH128	68214602	68222000	cluster07	4	7399	9.16	41.6905	371
129	evm.TU.cluster07.8465	SmbHLH129	70510385	70513187	cluster07	25	2803	5.98	48.4161	441
130	evm.TU.cluster07.8699	SmbHLH130	72501095	72503725	cluster07	27	2631	6.03	44.6775	406
131	evm.TU.cluster08.4508	SmbHLH131	37443901	37449382	cluster08	31	5482	9.76	22.5658	203
132	evm.TU.cluster08.5462	SmbHLH132	45685951	45686655	cluster08	17	705	4.84	26.4188	234
133	evm.TU.cluster08.5575	SmbHLH133	46887153	46888901	cluster08	9	1749	5.59	56.9635	510
134	evm.TU.cluster08.6558	SmbHLH134	55342848	55349985	cluster08	31	7138	5.46	52.9947	474
135	evm.TU.cluster08.6720	SmbHLH135	56639984	56643104	cluster08	1	3121	5.69	52.426	469
136	evm.TU.cluster08.6726	SmbHLH136	56696532	56698527	cluster08	25	1996	8.21	39.2121	352
137	evm.TU.cluster08.6982	SmbHLH137	58879979	58881788	cluster08	25	1810	6.71	24.5196	221
138	evm.TU.cluster08.7026	SmbHLH138	59290151	59291796	cluster08	16	1646	7.95	10.4187	92
139	evm.TU.cluster08.7030	SmbHLH139	59332805	59334448	cluster08	4	1644	5.48	25.0875	227
140	evm.TU.cluster08.7167	SmbHLH140	60534168	60542378	cluster08	14	8211	8.07	62.4453	566
141	evm.TU.cluster08.7475	SmbHLH141	63412792	63416009	cluster08	26	3218	5.92	43.7576	415
142	evm.TU.cluster08.7702	SmbHLH142	65537440	65540728	cluster08	1	3289	5.09	27.8937	246
143	evm.TU.cluster08.7753	SmbHLH143	66068487	66072166	cluster08	7	3680	8.83	57.9216	512
144	evm.TU.cluster08.8141	SmbHLH144	69491354	69492153	cluster08	11	800	9.21	21.2336	191
145	evm.TU.cluster09.604	SmbHLH145	4835585	4837765	cluster09	7	2181	6.58	40.2015	347
146	evm.TU.cluster09.2114	SmbHLH146	17831763	17839003	cluster09	24	7241	7.6	52.7069	489
147	evm.TU.cluster09.2802	SmbHLH147	23399421	23403980	cluster09	3	4560	7.57	37.61	334
148	evm.TU.cluster09.2810	SmbHLH148	23497376	23502662	cluster09	3	5287	6.1	36.8636	324
149	evm.TU.cluster09.3226	SmbHLH149	26757676	26760287	cluster09	25	2612	5.65	59.1283	545
150	evm.TU.cluster09.3595	SmbHLH150	29655746	29659332	cluster09	16	3587	9.52	22.9164	196
151	evm.TU.cluster09.4358	SmbHLH151	35771588	35772067	cluster09	31	480	8.43	18.0547	159
152	evm.TU.cluster09.8819	SmbHLH152	73356294	73360781	cluster09	12	4488	7.02	23.776	208
153	evm.TU.cluster09.8830	SmbHLH153	73471976	73473092	cluster09	12	1117	8.63	21.6218	190
154	evm.TU.cluster09.9305	SmbHLH154	77476437	77479010	cluster09	27	2574	7.67	47.6877	436
155	evm.TU.cluster09.9801	SmbHLH155	81855420	81857598	cluster09	30	2179	5.43	36.6646	319
156	evm.TU.cluster09.10364	SmbHLH156	86477833	86480605	cluster09	15	2773	6.36	49.5037	446
157	evm.TU.cluster09.10445	SmbHLH157	87079621	87081980	cluster09	4	2360	7.68	25.8404	236
158	evm.TU.cluster09.10568	SmbHLH158	88056001	88057474	cluster09	13	1474	8.53	28.7491	258
159	evm.TU.cluster09.11202	SmbHLH159	93479240	93480845	cluster09	1	1606	4.89	35.764	323

## Sheet: S. japonica
NO.	Gene ID	Gene name	Start	End	Chromosome	Group	Gene leng	pI	MW (kDa)	Protein length
1	GHAGGene00479	SjbHLH001	12392566	12394068	Hic_asm_0	25	1503	6.6	26.6763	235
2	GHAGGene00546	SjbHLH002	13858780	13861807	Hic_asm_0	13	3028	5.74	37.4513	340
3	GHAGGene00584	SjbHLH003	14721392	14723659	Hic_asm_0	10	2268	5.24	48.3284	425
4	GHAGGene00614	SjbHLH004	15328996	15332827	Hic_asm_0	25	3832	5.63	60.2097	564
5	GHAGGene00629	SjbHLH005	15494031	15500635	Hic_asm_0	14	6605	6.57	37.0369	337
6	GHAGGene00848	SjbHLH006	18221399	18224355	Hic_asm_0	25	2957	6.62	31.0405	284
7	GHAGGene00990	SjbHLH007	20009705	20010504	Hic_asm_0	13	800	10.84	21.8706	197
8	GHAGGene01044	SjbHLH008	20560210	20561874	Hic_asm_0	1	1665	4.75	37.1339	331
9	GHAGGene01060	SjbHLH009	20758248	20760714	Hic_asm_0	2	2467	5.44	73.0268	670
10	GHAGGene01072	SjbHLH010	20914184	20916119	Hic_asm_0	10	1936	7.19	34.3541	300
11	GHAGGene01345	SjbHLH011	23669313	23673037	Hic_asm_0	4	3725	6.57	37.6738	341
12	GHAGGene01552	SjbHLH012	25926583	25927317	Hic_asm_0	31	735	9.74	27.2196	244
13	GHAGGene01561	SjbHLH013	26020351	26024294	Hic_asm_0	24	3944	5.51	39.749	365
14	GHAGGene01684	SjbHLH014	27349628	27352480	Hic_asm_0	3	2853	5.39	39.8327	357
15	GHAGGene01685	SjbHLH015	27367686	27369540	Hic_asm_0	3	1855	6.04	40.5295	363
16	GHAGGene01686	SjbHLH016	27377846	27379566	Hic_asm_0	3	1721	6.34	42.3188	382
17	GHAGGene01933	SjbHLH017	30087100	30091262	Hic_asm_0	5	4163	5.71	69.7968	625
18	GHAGGene02257	SjbHLH018	33161413	33163014	Hic_asm_0	28	1602	4.96	40.8512	372
19	GHAGGene02258	SjbHLH019	33166558	33168104	Hic_asm_0	28	1547	4.74	40.0861	364
20	GHAGGene02340	SjbHLH020	138861	143749	Hic_asm_1	15	4889	9.48	18.7376	166
21	GHAGGene02448	SjbHLH021	1309282	1311776	Hic_asm_1	10	2495	5.63	44.9567	397
22	GHAGGene02475	SjbHLH022	1623179	1624663	Hic_asm_1	2	1485	5.47	55.4585	494
23	GHAGGene02507	SjbHLH023	2151581	2154295	Hic_asm_1	2	2715	6.24	67.8652	612
24	GHAGGene02653	SjbHLH024	3770879	3777098	Hic_asm_1	26	6220	6.01	45.6647	422
25	GHAGGene02740	SjbHLH025	4667634	4669530	Hic_asm_1	10	1897	5.24	37.4411	335
26	GHAGGene02872	SjbHLH026	5918389	5923969	Hic_asm_1	27	5581	7.7	35.4312	330
27	GHAGGene02903	SjbHLH027	6172683	6179482	Hic_asm_1	24	6800	5.79	89.038	824
28	GHAGGene02932	SjbHLH028	6503234	6511132	Hic_asm_1	24	7899	9.11	64.6569	593
29	GHAGGene03535	SjbHLH029	13110374	13116676	Hic_asm_1	24	6303	5.97	60.3846	548
30	GHAGGene03639	SjbHLH030	14206109	14212378	Hic_asm_1	23	6270	6.37	70.6217	633
31	GHAGGene03640	SjbHLH031	14217192	14220887	Hic_asm_1	23	3696	8.44	32.391	290
32	GHAGGene03652	SjbHLH032	14403985	14406190	Hic_asm_1	2	2206	6.01	55.9352	512
33	GHAGGene03681	SjbHLH033	14654459	14659436	Hic_asm_1	26	4978	6.24	31.5478	297
34	GHAGGene03755	SjbHLH034	15459186	15463204	Hic_asm_1	ophan	4019	5.32	36.7511	329
35	GHAGGene03850	SjbHLH035	16535778	16543574	Hic_asm_1	27	7797	8.92	57.121	508
36	GHAGGene03853	SjbHLH036	16584704	16591339	Hic_asm_1	25	6636	5.5	41.4714	373
37	GHAGGene03948	SjbHLH037	17988960	17990443	Hic_asm_1	12	1484	6.73	28.1291	244
38	GHAGGene03991	SjbHLH038	18553169	18554929	Hic_asm_1	13	1761	6.61	26.6672	239
39	GHAGGene04244	SjbHLH039	21913882	21918767	Hic_asm_1	1	4886	5.46	58.9272	540
40	GHAGGene04770	SjbHLH040	36755769	36761459	Hic_asm_1	14	5691	5.3	38.0385	341
41	GHAGGene11427	SjbHLH041	3375625	3389462	Hic_asm_2	3	13838	6.54	50.3724	454
42	GHAGGene11449	SjbHLH042	3546505	3559503	Hic_asm_2	4	12999	6.23	25.4509	228
43	GHAGGene11463	SjbHLH043	3675319	3676434	Hic_asm_2	1	1116	5.34	23.9915	207
44	GHAGGene11467	SjbHLH044	3702822	3705738	Hic_asm_2	15	2917	5.12	50.4209	466
45	GHAGGene11587	SjbHLH045	5327872	5328973	Hic_asm_2	12	1102	7.78	20.0749	178
46	GHAGGene11692	SjbHLH046	6523782	6527446	Hic_asm_2	13	3665	8.27	29.5815	269
47	GHAGGene11949	SjbHLH047	9672995	9674805	Hic_asm_2	10	1811	7.01	21.1174	191
48	GHAGGene12484	SjbHLH048	16050180	16051929	Hic_asm_2	9	1750	5.36	56.2687	506
49	GHAGGene12581	SjbHLH049	17684923	17691282	Hic_asm_2	1	6360	5.68	29.4786	258
50	GHAGGene12615	SjbHLH050	18335424	18339852	Hic_asm_2	7	4429	7.29	64.6083	575
51	GHAGGene12895	SjbHLH051	23018663	23022718	Hic_asm_2	26	4056	7.1	33.7953	331
52	GHAGGene13231	SjbHLH052	32753339	32763206	Hic_asm_2	14	9868	8.34	62.0216	564
53	GHAGGene13292	SjbHLH053	33999123	34003448	Hic_asm_2	24	4326	7.68	49.7431	451
54	GHAGGene13337	SjbHLH054	34713277	34716426	Hic_asm_2	4	3150	5.49	25.8831	234
55	GHAGGene13386	SjbHLH055	35269967	35275544	Hic_asm_2	25	5578	5.74	29.8884	275
56	GHAGGene13433	SjbHLH056	35937869	35939172	Hic_asm_2	12	1304	9.37	21.0385	184
57	GHAGGene13650	SjbHLH057	38681686	38684270	Hic_asm_2	25	2585	8.53	39.4832	351
58	GHAGGene13656	SjbHLH058	38763246	38766290	Hic_asm_2	1	3045	5.94	59.0755	541
59	GHAGGene13794	SjbHLH059	40349174	40349980	Hic_asm_2	31	807	6.14	29.6151	268
60	GHAGGene14068	SjbHLH060	43301457	43305017	Hic_asm_2	10	3561	5.15	36.7553	333
61	GHAGGene14331	SjbHLH061	46583628	46584936	Hic_asm_2	10	1309	5.86	37.9738	343
62	GHAGGene14417	SjbHLH062	47809613	47811436	Hic_asm_2	1	1824	4.6	37.7766	330
63	GHAGGene14848	SjbHLH063	53103975	53107804	Hic_asm_2	25	3830	5.64	45.9622	428
64	GHAGGene14885	SjbHLH064	53546007	53547477	Hic_asm_2	28	1471	4.89	39.1781	351
65	GHAGGene14941	SjbHLH065	54281146	54284364	Hic_asm_2	24	3219	8.17	37.5314	346
66	GHAGGene14944	SjbHLH066	54322546	54323364	Hic_asm_2	31	819	7.88	29.7317	272
67	GHAGGene15078	SjbHLH067	55845185	55850571	Hic_asm_2	15	5387	6.6	47.1333	431
68	GHAGGene15277	SjbHLH068	58291621	58294716	Hic_asm_2	25	3096	5.47	47.8146	437
69	GHAGGene15425	SjbHLH069	59755737	59758293	Hic_asm_2	1	2557	5.38	57.0024	501
70	GHAGGene15592	SjbHLH070	1238547	1241670	Hic_asm_3	11	3124	6.72	33.2444	296
71	GHAGGene15655	SjbHLH071	1814205	1819940	Hic_asm_3	15	5736	9.06	18.3221	166
72	GHAGGene15754	SjbHLH072	2847172	2848104	Hic_asm_3	12	933	9.25	20.0528	177
73	GHAGGene15869	SjbHLH073	4212222	4215699	Hic_asm_3	15	3478	5.1	50.4616	463
74	GHAGGene15872	SjbHLH074	4253535	4254585	Hic_asm_3	1	1051	6.77	20.4748	178
75	GHAGGene15905	SjbHLH075	4577279	4579835	Hic_asm_3	3	2557	6.04	38.4359	342
76	GHAGGene16192	SjbHLH076	8190763	8192482	Hic_asm_3	9	1720	5.5	56.1826	505
77	GHAGGene16901	SjbHLH077	22660544	22672965	Hic_asm_3	31	12422	6.4	43.0485	389
78	GHAGGene17026	SjbHLH078	24153180	24156346	Hic_asm_3	1	3167	6	60.67	561
79	GHAGGene17033	SjbHLH079	24243652	24246176	Hic_asm_3	25	2525	6.33	38.8926	348
80	GHAGGene17211	SjbHLH080	26070041	26071186	Hic_asm_3	12	1146	9.37	21.6594	188
81	GHAGGene17214	SjbHLH081	26114398	26115793	Hic_asm_3	12	1396	9.16	22.388	195
82	GHAGGene17262	SjbHLH082	26614402	26619519	Hic_asm_3	25	5118	5.3	30.1265	278
83	GHAGGene17305	SjbHLH083	27067158	27069871	Hic_asm_3	4	2714	7.07	24.6734	222
84	GHAGGene17409	SjbHLH084	28204594	28212069	Hic_asm_3	14	7476	8.78	62.3824	563
85	GHAGGene17661	SjbHLH085	30757017	30760924	Hic_asm_3	26	3908	6.04	51.408	485
86	GHAGGene17837	SjbHLH086	32776347	32782684	Hic_asm_3	1	6338	5.46	27.5616	242
87	GHAGGene17879	SjbHLH087	33348144	33353247	Hic_asm_3	7	5104	5.99	60.3482	540
88	GHAGGene18212	SjbHLH088	36815226	36820431	Hic_asm_3	25	5206	6.25	23.1782	200
89	GHAGGene18220	SjbHLH089	36886249	36887473	Hic_asm_3	11	1225	7.72	24.1207	221
90	GHAGGene18626	SjbHLH090	1076705	1082888	Hic_asm_4	26	6184	6.43	41.892	391
91	GHAGGene18692	SjbHLH091	1642182	1643762	Hic_asm_4	10	1581	5.43	35.8913	321
92	GHAGGene18774	SjbHLH092	2345455	2349223	Hic_asm_4	24	3769	8.99	64.3608	589
93	GHAGGene18805	SjbHLH093	2615746	2620742	Hic_asm_4	24	4997	5.45	79.1052	739
94	GHAGGene19096	SjbHLH094	5310450	5317022	Hic_asm_4	5	6573	5.18	75.398	676
95	GHAGGene19158	SjbHLH095	5989940	5994801	Hic_asm_4	26	4862	6.1	30.805	285
96	GHAGGene19184	SjbHLH096	6257209	6263561	Hic_asm_4	2	6353	5.66	64.0789	583
97	GHAGGene19193	SjbHLH097	6399631	6409503	Hic_asm_4	23	9873	6.22	77.2303	694
98	GHAGGene19284	SjbHLH098	7340358	7350951	Hic_asm_4	24	10594	5.93	58.2234	527
99	GHAGGene19744	SjbHLH099	13813124	13816245	Hic_asm_4	27	3122	8.15	43.9637	402
100	GHAGGene19747	SjbHLH100	13882429	13888608	Hic_asm_4	25	6180	5.58	36.7882	337
101	GHAGGene19882	SjbHLH101	17115805	17117802	Hic_asm_4	12	1998	9.18	27.7978	246
102	GHAGGene19972	SjbHLH102	20631130	20636412	Hic_asm_4	1	5283	5.15	56.357	518
103	GHAGGene20311	SjbHLH103	27018896	27023127	Hic_asm_4	14	4232	6.56	33.6845	305
104	GHAGGene21029	SjbHLH104	3987147	3992302	Hic_asm_5	24	5156	7.59	60.4838	551
105	GHAGGene21270	SjbHLH105	6535635	6536901	Hic_asm_5	13	1267	8.79	28.9461	263
106	GHAGGene21405	SjbHLH106	8133309	8134847	Hic_asm_5	28	1539	6.11	34.706	316
107	GHAGGene21708	SjbHLH107	12039479	12041439	Hic_asm_5	1	1961	4.58	37.8097	331
108	GHAGGene21747	SjbHLH108	12767308	12768243	Hic_asm_5	13	936	7.01	29.0525	268
109	GHAGGene21777	SjbHLH109	13248972	13250702	Hic_asm_5	10	1731	5.93	37.0146	338
110	GHAGGene22025	SjbHLH110	17153280	17155150	Hic_asm_5	10	1871	5.75	39.7229	355
111	GHAGGene22569	SjbHLH111	27542620	27546219	Hic_asm_5	25	3600	5.68	45.7855	426
112	GHAGGene22607	SjbHLH112	27961157	27962684	Hic_asm_5	28	1528	4.91	41.6231	373
113	GHAGGene22649	SjbHLH113	28469068	28472954	Hic_asm_5	24	3887	6.55	36.4417	333
114	GHAGGene22652	SjbHLH114	28510211	28511026	Hic_asm_5	31	816	8.67	29.787	271
115	GHAGGene23035	SjbHLH115	1399063	1401924	Hic_asm_6	2	2862	6.25	67.9176	612
116	GHAGGene23070	SjbHLH116	1880953	1882709	Hic_asm_6	2	1757	5.64	54.9529	488
117	GHAGGene23091	SjbHLH117	2159587	2162453	Hic_asm_6	10	2867	5.41	44.6655	392
118	GHAGGene23307	SjbHLH118	4571371	4572771	Hic_asm_6	31	1401	5.31	51.0479	466
119	GHAGGene23364	SjbHLH119	5200682	5205838	Hic_asm_6	15	5157	6.76	34.9592	319
120	GHAGGene23366	SjbHLH120	5215047	5223404	Hic_asm_6	15	8358	8.92	95.619	865
121	GHAGGene23497	SjbHLH121	6546452	6550626	Hic_asm_6	3	4175	4.92	24.8794	222
122	GHAGGene23498	SjbHLH122	6556050	6559564	Hic_asm_6	3	3515	7.08	34.3492	308
123	GHAGGene23499	SjbHLH123	6608666	6611658	Hic_asm_6	3	2993	5.98	36.7665	326
124	GHAGGene23500	SjbHLH124	6621041	6623564	Hic_asm_6	3	2524	5.32	41.4322	372
125	GHAGGene23501	SjbHLH125	6635247	6637789	Hic_asm_6	3	2543	5.81	40.9348	365
126	GHAGGene23846	SjbHLH126	10552687	10558908	Hic_asm_6	24	6222	7.15	48.9064	453
127	GHAGGene23872	SjbHLH127	10922251	10923553	Hic_asm_6	1	1303	4.57	16.3966	149
128	GHAGGene24304	SjbHLH128	18656624	18659619	Hic_asm_6	25	2996	6.26	62.1272	571
129	GHAGGene24486	SjbHLH129	25298430	25301949	Hic_asm_6	3	3520	6.43	39.771	358
130	GHAGGene24487	SjbHLH130	25327624	25330965	Hic_asm_6	3	3342	7.74	42.3847	381
131	GHAGGene24492	SjbHLH131	25503611	25506501	Hic_asm_6	3	2891	5.96	38.0487	339
132	GHAGGene24710	SjbHLH132	735104	740477	Hic_asm_7	27	5374	8.11	50.3519	460
133	GHAGGene25068	SjbHLH133	11930395	11932284	Hic_asm_7	30	1890	4.88	34.5461	304
134	GHAGGene25435	SjbHLH134	18579278	18582457	Hic_asm_7	15	3180	5.77	50.0584	455
135	GHAGGene25463	SjbHLH135	19142801	19146688	Hic_asm_7	4	3888	6.64	25.9016	236
136	GHAGGene25526	SjbHLH136	20022112	20024056	Hic_asm_7	13	1945	8.58	28.8409	258
137	GHAGGene25596	SjbHLH137	20755545	20756462	Hic_asm_7	12	918	6	23.1454	204
138	GHAGGene25687	SjbHLH138	21750502	21754404	Hic_asm_7	4	3903	6.98	26.166	231
139	GHAGGene25900	SjbHLH139	24109149	24110780	Hic_asm_7	1	1632	5.01	35.3417	318
140	GHAGGene26166	SjbHLH140	26845787	26849349	Hic_asm_7	27	3563	6.08	43.5854	394
141	GHAGGene26294	SjbHLH141	28190299	28193538	Hic_asm_7	25	3240	6.05	49.157	449
142	GHAGGene26502	SjbHLH142	30000461	30004003	Hic_asm_7	4	3543	8.38	41.7784	371
143	GHAGGene26773	SjbHLH143	32648160	32655312	Hic_asm_7	27	7153	5.39	25.916	232
144	GHAGGene26912	SjbHLH144	1233476	1235605	Hic_asm_8	3	2130	5.43	40.6225	367
145	GHAGGene26913	SjbHLH145	1250253	1253966	Hic_asm_8	3	3714	6.29	41.4107	369
146	GHAGGene26914	SjbHLH146	1263530	1266927	Hic_asm_8	3	3398	8.01	36.5947	326
147	GHAGGene26915	SjbHLH147	1366907	1369849	Hic_asm_8	3	2943	6.33	37.1164	333
148	GHAGGene27073	SjbHLH148	2892692	2895778	Hic_asm_8	15	3087	7.11	35.2014	321
149	GHAGGene27122	SjbHLH149	3414036	3415400	Hic_asm_8	31	1365	5.33	49.8094	454
150	GHAGGene27262	SjbHLH150	4812053	4815080	Hic_asm_8	27	3028	6.02	46.9257	425
151	GHAGGene27476	SjbHLH151	7277547	7279423	Hic_asm_8	1	1877	5.04	35.6259	321
152	GHAGGene27682	SjbHLH152	9483988	9487350	Hic_asm_8	4	3363	6.85	25.2239	225
153	GHAGGene27777	SjbHLH153	10487122	10487993	Hic_asm_8	12	872	6.32	23.3105	205
154	GHAGGene27825	SjbHLH154	11007228	11009053	Hic_asm_8	13	1826	8.25	27.7848	249
155	GHAGGene27885	SjbHLH155	11673943	11677978	Hic_asm_8	4	4036	9.46	33.9179	308
156	GHAGGene27907	SjbHLH156	11992117	11995351	Hic_asm_8	15	3235	6.12	49.7101	453
157	GHAGGene28277	SjbHLH157	16225268	16227484	Hic_asm_8	30	2217	4.9	34.7895	305
158	GHAGGene28394	SjbHLH158	17884383	17887496	Hic_asm_8	27	3114	6.76	48.1744	439
159	GHAGGene28939	SjbHLH159	496230	497612	Hic_asm_9	2	1383	6	51.7017	460
160	GHAGGene28957	SjbHLH160	872806	878076	Hic_asm_9	23	5271	5	92.9215	840
161	GHAGGene29408	SjbHLH161	12859072	12865285	Hic_asm_9	24	6214	6.19	60.3522	549
162	GHAGGene30042	SjbHLH162	19950539	19952071	Hic_asm_9	28	1533	6.27	37.7331	338
163	GHAGGene30184	SjbHLH163	21423419	21424796	Hic_asm_9	13	1378	9.44	30.4399	276
164	GHAGGene05225	SjbHLH164	2007240	2009057	Hic_asm_10	25	1818	6.19	30.3854	271
165	GHAGGene05569	SjbHLH165	5514410	5519216	Hic_asm_10	5	4807	6.36	74.4005	662
166	GHAGGene05633	SjbHLH166	6156681	6157687	Hic_asm_10	12	1007	9.69	33.1338	290
167	GHAGGene05831	SjbHLH167	8381109	8384086	Hic_asm_10	3	2978	5.06	42.456	386
168	GHAGGene05832	SjbHLH168	8405577	8407881	Hic_asm_10	3	2305	5.91	40.7948	370
169	GHAGGene05833	SjbHLH169	8414968	8416910	Hic_asm_10	3	1943	8.12	42.7896	383
170	GHAGGene05834	SjbHLH170	8428763	8430408	Hic_asm_10	3	1646	6.2	39.3572	352
171	GHAGGene05960	SjbHLH171	10037238	10041434	Hic_asm_10	24	4197	5.96	43.7565	402
172	GHAGGene05970	SjbHLH172	10161819	10162598	Hic_asm_10	31	780	9.3	28.9464	259
173	GHAGGene06492	SjbHLH173	21627388	21629106	Hic_asm_10	9	1719	5.42	56.0352	506
174	GHAGGene06523	SjbHLH174	22784557	22793944	Hic_asm_10	25	9388	5.45	64.5175	597
175	GHAGGene06532	SjbHLH175	23125575	23131571	Hic_asm_10	14	5997	5.77	36.2952	332
176	GHAGGene06578	SjbHLH176	24350213	24352256	Hic_asm_10	10	2044	8.6	34.0248	300
177	GHAGGene06589	SjbHLH177	24668031	24670424	Hic_asm_10	2	2394	5.63	71.021	648
178	GHAGGene06601	SjbHLH178	24924820	24926447	Hic_asm_10	1	1628	4.77	37.2179	331
179	GHAGGene06710	SjbHLH179	26816010	26819472	Hic_asm_10	1	3463	6.74	53.2806	474
180	GHAGGene06793	SjbHLH180	27980529	27983770	Hic_asm_10	25	3242	7.86	30.75	284
181	GHAGGene07889	SjbHLH181	25055804	25056597	Hic_asm_11	12	794	8.96	20.6348	179
182	GHAGGene07890	SjbHLH182	25083054	25084172	Hic_asm_11	12	1119	7.75	27.4222	240
183	GHAGGene08187	SjbHLH183	28298825	28300623	Hic_asm_11	25	1799	5.49	28.6583	255
184	GHAGGene08277	SjbHLH184	29227906	29231400	Hic_asm_11	15	3495	6.26	37.5279	341
185	GHAGGene08453	SjbHLH185	591334	598981	Hic_asm_12	27	7648	6.86	36.9089	346
186	GHAGGene08641	SjbHLH186	2255727	2258220	Hic_asm_12	1	2494	5.18	68.4982	603
187	GHAGGene08834	SjbHLH187	4339786	4341798	Hic_asm_12	15	2013	6.45	29.3976	271
188	GHAGGene08865	SjbHLH188	4608454	4610032	Hic_asm_12	28	1579	4.9	39.7948	363
189	GHAGGene08866	SjbHLH189	4612509	4614076	Hic_asm_12	28	1568	4.85	39.0771	357
190	GHAGGene09067	SjbHLH190	6720181	6721334	Hic_asm_12	12	1154	9.11	27.4962	240
191	GHAGGene09068	SjbHLH191	6744693	6745667	Hic_asm_12	12	975	9.1	27.9743	245
192	GHAGGene09463	SjbHLH192	13526704	13529428	Hic_asm_12	13	2725	6.03	38.2501	345
193	GHAGGene09752	SjbHLH193	22751437	22756711	Hic_asm_12	4	5275	5.87	24.9413	223
194	GHAGGene09918	SjbHLH194	26073468	26078571	Hic_asm_12	23	5104	4.67	92.9894	842
195	GHAGGene10295	SjbHLH195	6460812	6465738	Hic_asm_13	24	4927	8.54	52.4924	489
196	GHAGGene10422	SjbHLH196	10777749	10781680	Hic_asm_13	25	3932	5.56	21.6977	193
197	GHAGGene10523	SjbHLH197	15480404	15490393	Hic_asm_13	3	9990	5.55	55.3331	498
198	GHAGGene10556	SjbHLH198	16370088	16373288	Hic_asm_13	3	3201	5.41	37.8615	337
199	GHAGGene10651	SjbHLH199	18579772	18582747	Hic_asm_13	25	2976	5.73	60.7926	562
200	GHAGGene30632	SjbHLH200	876738	878515	ctg000260	13	1778	8.22	31.523	279
201	GHAGGene30895	SjbHLH201	107161	108543	ctg000540	2	1383	5.99	51.6447	460
202	GHAGGene30607	SjbHLH202	958186	959918	ctg0001503	13	1733	8.6	31.576	279
203	GHAGGene30820	SjbHLH203	488227	490217	ctg0004201	12	1991	9.02	27.7537	246
