# Supplementary material for: Comparative genomics and transcriptomics analysis of the bHLH gene family indicate their roles in regulating flavonoid biosynthesis in Sophora flavescens
Source: Front Plant Sci. 2024 Sep 24;15:1445488. doi: 10.3389/fpls.2024.1445488 (PMC11458398; doi:10.3389/fpls.2024.1445488)
Supplement: Supplementary Table 2 — Synonymous and nonsynonymous substitution rates for the duplicated gene pairs among S. flavescens bHLH genes. Ka, nonsynonymous substitution rate; Ks, synonymous substitution rate. [file Table2.xlsx]

## Sheet: Sheet1
NO.	Duplicate gene pair	Duplicated gene 1	Duplicated gene 2	Duplicate type	Method	Ka	Ks	Ka/Ks
1	Sfla_2G0075100-Sfla_2G0075300	SfbHLH016	SfbHLH017	PD	YN	0.0101766	0.0343635	0.296147
2	Sfla_3G0044500-Sfla_3G0044800	SfbHLH035	SfbHLH036	PD	YN	0.518463	2.09868	0.247043
3	Sfla_3G0177100-Sfla_3G0177500	SfbHLH050	SfbHLH052	PD	YN	0.256522	0.290284	0.883692
4	Sfla_3G0177500-Sfla_3G0177800	SfbHLH052	SfbHLH054	PD	YN	0.364602	0.826167	0.441317
5	Sfla_3G0177600-Sfla_3G0177800	SfbHLH053	SfbHLH054	PD	YN	0.04057	0.115463	0.351367
6	Sfla_3G0177800-Sfla_3G0178000	SfbHLH054	SfbHLH055	PD	YN	0.00788092	0.0448977	0.175531
7	Sfla_3G0178000-Sfla_3G0178600	SfbHLH055	SfbHLH057	PD	YN	0.302132	0.42535	0.710314
8	Sfla_9G0145800-Sfla_9G0146200	SfbHLH159	SfbHLH160	PD	YN	0.0018598	0.015934	0.116719
9	Sfla_6G0313800-Sfla_6G0313900	SfbHLH122	SfbHLH123	TD	YN	0.232392	0.781767	0.297266
10	Sfla_1G0114600-Sfla_5G0019400	SfbHLH004	SfbHLH084	TRD	YN	0.655453	3.99494	0.164071
11	Sfla_3G0053900-Sfla_1G0298800	SfbHLH038	SfbHLH008	TRD	YN	0.705779	3.61547	0.195211
12	Sfla_2G0116000-Sfla_5G0019400	SfbHLH021	SfbHLH084	TRD	YN	0.601949	3.85496	0.156149
13	Sfla_3G0104300-Sfla_4G0219100	SfbHLH041	SfbHLH075	TRD	YN	0.58905	4.37302	0.134701
14	Sfla_3G0309700-Sfla_4G0219100	SfbHLH063	SfbHLH075	TRD	YN	0.795461	4.27192	0.186207
15	Sfla_6G0236500-Sfla_4G0219100	SfbHLH117	SfbHLH075	TRD	YN	0.754682	4.11361	0.18346
16	Sfla_6G0245900-Sfla_4G0219100	SfbHLH119	SfbHLH075	TRD	YN	0.746463	4.2616	0.17516
17	Sfla_5G0172200-Sfla_4G0286400	SfbHLH089	SfbHLH082	TRD	YN	0.558835	3.75353	0.148883
18	Sfla_5G0212000-Sfla_8G0073700	SfbHLH096	SfbHLH144	TRD	YN	0.804174	4.5129	0.178194
19	Sfla_6G0045800-Sfla_8G0102300	SfbHLH104	SfbHLH147	TRD	YN	0.575527	3.92388	0.146673
20	Sfla_6G0194300-Sfla_8G0073700	SfbHLH112	SfbHLH144	TRD	YN	0.738294	4.48346	0.16467
21	Sfla_1G0298800-Sfla_4G0279400	SfbHLH008	SfbHLH081	WGD	YN	0.114437	0.560589	0.204138
22	Sfla_4G0286400-Sfla_8G0188800	SfbHLH082	SfbHLH151	WGD	YN	0.118955	0.486474	0.244524
23	Sfla_7G0042200-Sfla_8G0185100	SfbHLH129	SfbHLH150	WGD	YN	0.09566	0.895743	0.106794
24	Sfla_7G0085000-Sfla_8G0102300	SfbHLH135	SfbHLH147	WGD	YN	0.107452	0.451048	0.238227
25	Sfla_1G0054000-Sfla_0014U0002500	SfbHLH002	SfbHLH166	DSD	YN	0.107029	0.0997257	1.07323
26	Sfla_1G0391600-Sfla_3G0102600	SfbHLH012	SfbHLH040	DSD	YN	0.430714	3.95817	0.108816
27	Sfla_4G0221400-Sfla_1G0391600	SfbHLH077	SfbHLH012	DSD	YN	0.505544	3.92963	0.128649
28	Sfla_2G0143000-Sfla_5G0199800	SfbHLH022	SfbHLH094	DSD	YN	0.0304439	0.0375959	0.809766
29	Sfla_2G0143300-Sfla_9G0103300	SfbHLH023	SfbHLH158	DSD	YN	0.263619	0.802055	0.328679
30	Sfla_2G0193800-Sfla_6G0278800	SfbHLH027	SfbHLH0120	DSD	YN	0.469411	1.88386	0.249175
31	Sfla_2G0343500-Sfla_7G0244200	SfbHLH034	SfbHLH0140	DSD	YN	0.0879121	0.449798	0.195448
32	Sfla_3G0053500-Sfla_6G0219000	SfbHLH037	SfbHLH115	DSD	YN	0.665964	3.99575	0.166668
33	Sfla_3G0102600-Sfla_4G0221400	SfbHLH040	SfbHLH077	DSD	YN	0.531663	2.53789	0.20949
34	Sfla_3G0138800-Sfla_6G0325400	SfbHLH045	SfbHLH124	DSD	YN	0.66788	4.20288	0.15891
35	Sfla_3G0232500-Sfla_7G0169700	SfbHLH060	SfbHLH138	DSD	YN	0.33244	1.59742	0.20811
36	Sfla_4G0153300-Sfla_4G0221400	SfbHLH072	SfbHLH077	DSD	YN	0.611994	4.11193	0.148834
37	Sfla_6G0111900-Sfla_4G0153300	SfbHLH107	SfbHLH072	DSD	YN	0.573062	3.93034	0.145805
38	Sfla_4G0176000-Sfla_7G0082800	SfbHLH073	SfbHLH134	DSD	YN	0.117092	1.11616	0.104906
39	Sfla_4G0192400-Sfla_5G0199800	SfbHLH074	SfbHLH094	DSD	YN	0.0253435	0.0209913	1.20733
40	Sfla_4G0252300-Sfla_5G0142500	SfbHLH080	SfbHLH088	DSD	YN	0.692418	4.01676	0.172382
