# Supplementary material for: Comparative genomics and transcriptomics analysis of the bHLH gene family indicate their roles in regulating flavonoid biosynthesis in Sophora flavescens
Source: Front Plant Sci. 2024 Sep 24;15:1445488. doi: 10.3389/fpls.2024.1445488 (PMC11458398; doi:10.3389/fpls.2024.1445488)
Supplement: Supplementary Table 3 — The accession NO. of RNA-seq raw data. [file Table3.xlsx]

## Sheet: Sheet1
NO.	Sample name	Accession	Bioproject accession	Biosample accession	Library layout
1	Leaf_1	SRR29900542	PRJNA1136989	SAMN42563874	paired
2	Leaf_2	SRR29900541	PRJNA1136989	SAMN42563875	paired
3	Leaf_3	SRR29900530	PRJNA1136989	SAMN42563876	paired
4	Stem_1	SRR29900519	PRJNA1136989	SAMN42563877	paired
5	Stem_2	SRR29900518	PRJNA1136989	SAMN42563878	paired
6	Stem_3	SRR29900517	PRJNA1136989	SAMN42563879	paired
7	Root_1	SRR29900516	PRJNA1136989	SAMN42563880	paired
8	Root_2	SRR29900515	PRJNA1136989	SAMN42563881	paired
9	Root_3	SRR29900514	PRJNA1136989	SAMN42563882	paired
10	Flower_1	SRR29900513	PRJNA1136989	SAMN42563883	paired
11	Flower_2	SRR29900540	PRJNA1136989	SAMN42563884	paired
12	Flower_3	SRR29900539	PRJNA1136989	SAMN42563885	paired
13	Pod1_1	SRR29900538	PRJNA1136989	SAMN42563886	paired
14	Pod1_2	SRR29900537	PRJNA1136989	SAMN42563887	paired
15	Pod1_3	SRR29900536	PRJNA1136989	SAMN42563888	paired
16	Pod2_1	SRR29900535	PRJNA1136989	SAMN42563889	paired
17	Pod2_2	SRR29900534	PRJNA1136989	SAMN42563890	paired
18	Pod2_3	SRR29900533	PRJNA1136989	SAMN42563891	paired
19	Pod3_1	SRR29900532	PRJNA1136989	SAMN42563892	paired
20	Pod3_2	SRR29900531	PRJNA1136989	SAMN42563893	paired
21	Pod3_3	SRR29900529	PRJNA1136989	SAMN42563894	paired
22	Pod4_1	SRR29900528	PRJNA1136989	SAMN42563895	paired
23	Pod4_2	SRR29900527	PRJNA1136989	SAMN42563896	paired
24	Pod4_3	SRR29900526	PRJNA1136989	SAMN42563897	paired
25	Pod5_1	SRR29900525	PRJNA1136989	SAMN42563898	paired
26	Pod5_2	SRR29900524	PRJNA1136989	SAMN42563899	paired
27	Pod5_3	SRR29900523	PRJNA1136989	SAMN42563900	paired
28	Pod6_1	SRR29900522	PRJNA1136989	SAMN42563901	paired
29	Pod6_2	SRR29900521	PRJNA1136989	SAMN42563902	paired
30	Pod6_3	SRR29900520	PRJNA1136989	SAMN42563903	paired
