# Supplementary material for: Comparative genomics and transcriptomics analysis of the bHLH gene family indicate their roles in regulating flavonoid biosynthesis in Sophora flavescens
Source: Front Plant Sci. 2024 Sep 24;15:1445488. doi: 10.3389/fpls.2024.1445488 (PMC11458398; doi:10.3389/fpls.2024.1445488)
Supplement: Supplementary Table 4 — Primer sequences used for RT‒qPCR. [file Table4.xlsx]

## Sheet: Sheet1
Gene name	Seq (5' to 3')
SfbHLH034-qF	GGTTTAATGAAGGTGGCTCT
SfbHLH034-qR	ACTCTGGGATTGTATTGGTG
SfbHLH042-qF	TGGAGGAGGGAAATAATGAG
SfbHLH042-qR	GGCTTTGTGGCACAGCAGAT
SfbHLH077-qF	TGCTGGTAATGGTTCTTCAA
SfbHLH077-qR	AGTTCGGACTTCACTTCTGC
SfbHLH091-qF	TGATGCTGTCCGAATGGTGA
SfbHLH091-qR	TGCCTTGAGCCTCTGTTTCT
SfbHLH113-qF	GAAAGAATCGCTGAAAGAATG
SfbHLH113-qR	AACCTGGAGCCTTAGGAACT
SfbHLH140-qF	AATGAGGGTGAGGGAAATGA
SfbHLH140-qR	TGGAGGCTCAGGAAGATTAG
SfbHLH143-qF	GATGATGTCCTTGGGATGTG
SfbHLH143-qR	AAATGGCATTACTGGTCTGTTC
SfbHLH162-qF	CCCAATCAGTGGTAACAGACA
SfbHLH162-qR	ATTTGCCGACGAGTCATAGC
EF-1α-qF	CTTGAGAAGGAACCCAAAT
EF-1α-qR	ATGTCCCTCACAGCAAAA
